# Supplementary material
Source: Royal Society of Chemistry journal article supplement (doi:10.1039/d6ay00123h)
Supplement: d6ay00123h1.pdf [file d6ay00123h1.pdf]

## **Supporting Information**

### **Synergistic Interface Engineering of Co(OH)<sub>2</sub>@AgNPs Heterojunction for Trace Electrochemical Hg<sup>2+</sup> Detection**

**Yanchao Sun, Hongliang Dai, Zheng Wang Weiqiang Fan\*, Hongye Bai\***

### Calculation of Limit of Detection (LOD) and limit of quantification (LOQ)

The Limit of Detection (LOD) and limit of quantification (LOQ) of the Co(OH)<sub>2</sub>@AgNPs sensor for Hg<sup>2+</sup> was calculated based on the standard signal-to-noise ratio equation (S/N = 3, S/N = 10), following the IUPAC guidelines. The calculation formula is as follows:

$$LOD = \frac{3\sigma}{S}$$

$$LOQ = \frac{10\sigma}{S}$$

Where:

- $\sigma$  represents the standard deviation of the blank response. It was derived by measuring the peak current of the blank electrolyte (0.5 M Na<sub>2</sub>SO<sub>4</sub> without Hg<sup>2+</sup>) for 10 consecutive measurements.
- $S$  represents the sensitivity of the sensor, corresponding to the slope of the linear calibration curve (Fig. 5) in the low concentration range.

In this work, the standard deviation ( $\sigma$ ) was determined to be 0.0084  $\mu$ A, and the slope ( $S$ ) was obtained from the linear regression equation ( $y = 0.02972x + 0.07245$ ) as 0.02972  $\mu$ A nM<sup>-1</sup>.

Consequently, the LOD was calculated to be 0.85 nM, LOQ was calculated to be 283 nM.

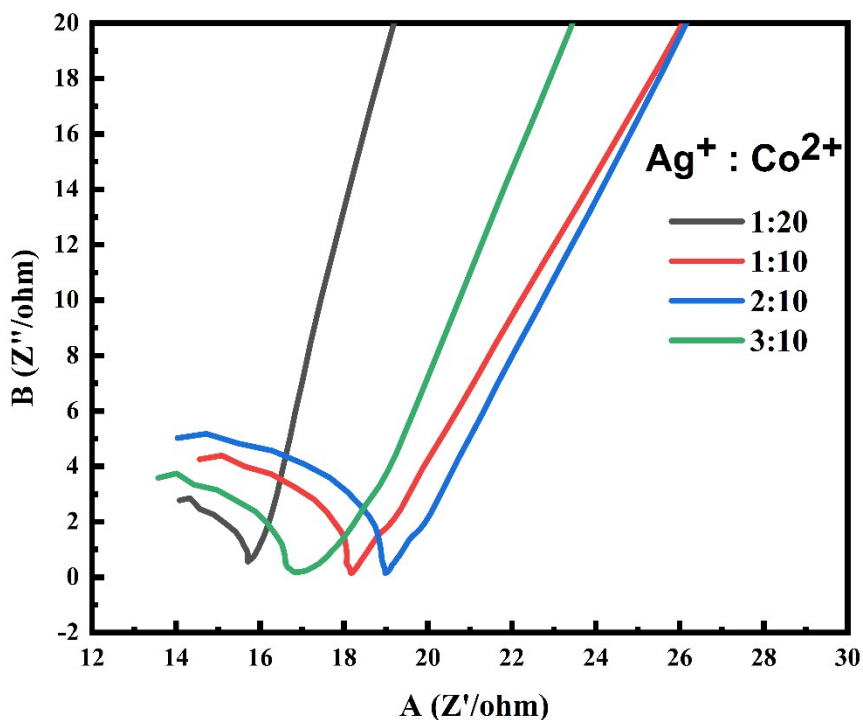

**Fig S1.** EIS comparison of FTO/Co(OH)<sub>2</sub>@AgNPs prepared from deposition solutions at different ratios.

**Table S1: Comparison of Electrochemical Parameters for FTO/Co(OH)<sub>2</sub>@AgNPs Prepared at Different Ag<sup>+</sup>:Co<sup>2+</sup> Deposition Ratios**

| Ag <sup>+</sup> :Co <sup>2+</sup><br>Deposition Ratio | Curve<br>Color | Solution<br>Resistance (R <sub>s</sub> /<br>Ω) | Charge Transfer<br>Resistance (R <sub>ct</sub> / Ω) | Conductivity<br>Evaluation |
|-------------------------------------------------------|----------------|------------------------------------------------|-----------------------------------------------------|----------------------------|
| 1:20                                                  | Black          | ≈11.2                                          | ≈5.5                                                | Low/Medium                 |
| 1:10                                                  | Red            | ≈11.4                                          | ≈8.5                                                | High                       |
| 2:10                                                  | Blue           | ≈11.3                                          | ≈4.8                                                | Good                       |
| 3:10                                                  | Green          | ≈11.1                                          | ≈2.5                                                | Excellent                  |

**Note:** The  $R_{ct}$  values are estimated based on the semicircle diameter read from the Nyquist plot (not precisely measured).

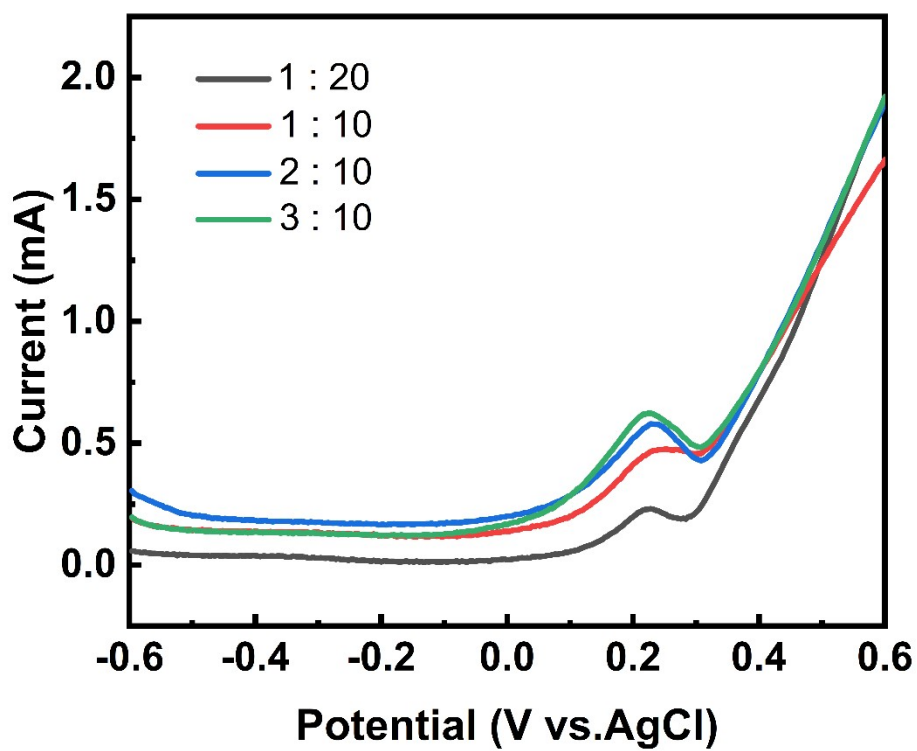

**Fig S2.** Comparison of SWV for Co(OH)<sub>2</sub>@AgNPs prepared from sedimentation solutions at different ratios.



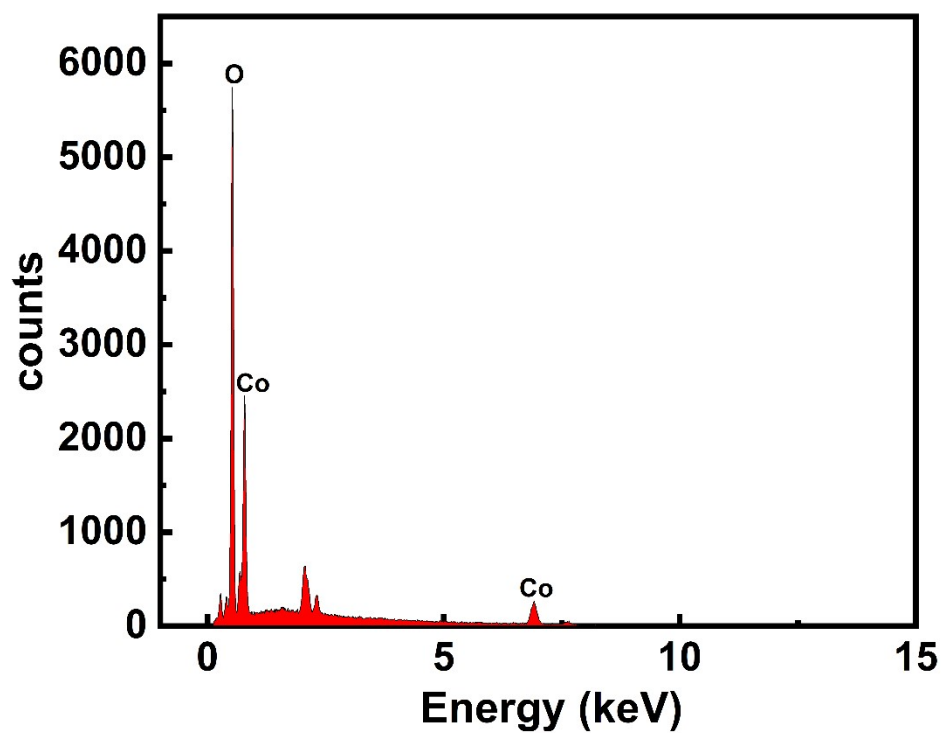

Fig S4. EDS spectrum of Co(OH)<sub>2</sub>.

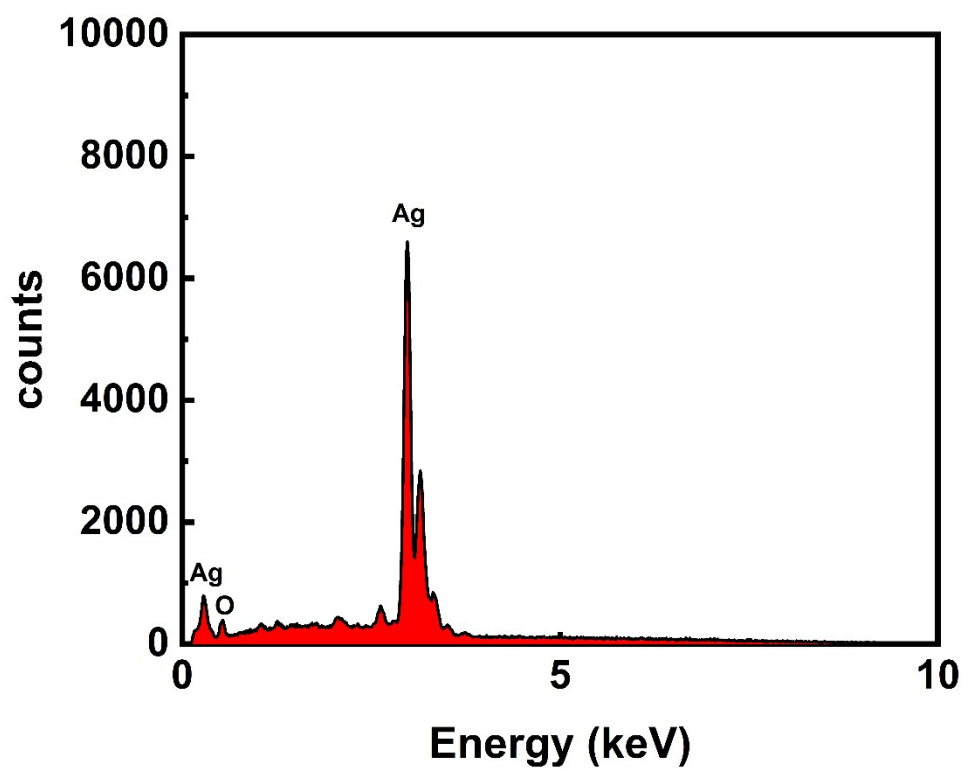

| Element | Mass Norm.[%] | Atom.[%] |
|---------|---------------|----------|
| Ag      | 98.444        | 90.36985 |
| O       | 1.556001      | 9.630151 |
| —       | 100           | 100      |

**Fig S5.** EDS spectrum and elemental composition analysis of silver-based material.

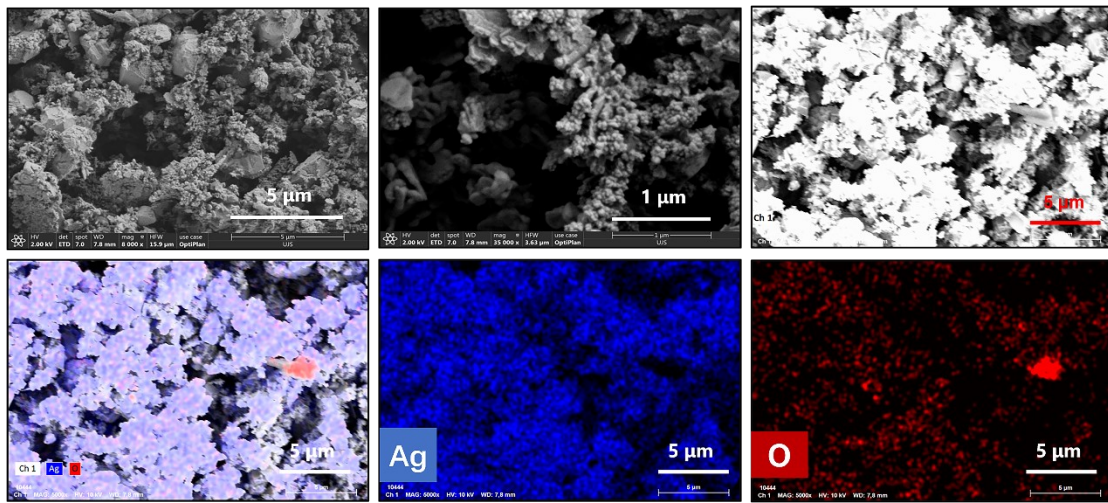

**Fig S6.** SEM and elemental distribution of AgNPs.

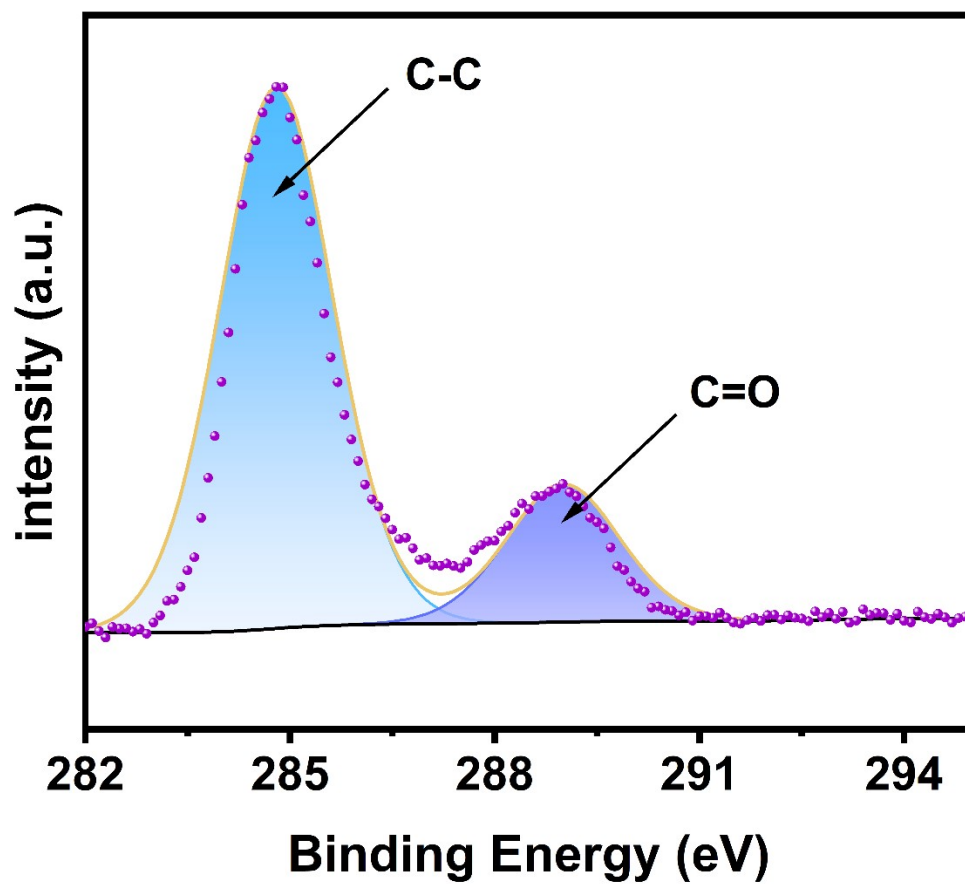

**Fig S7.** High-resolution XPS spectrum of the C 1s region.

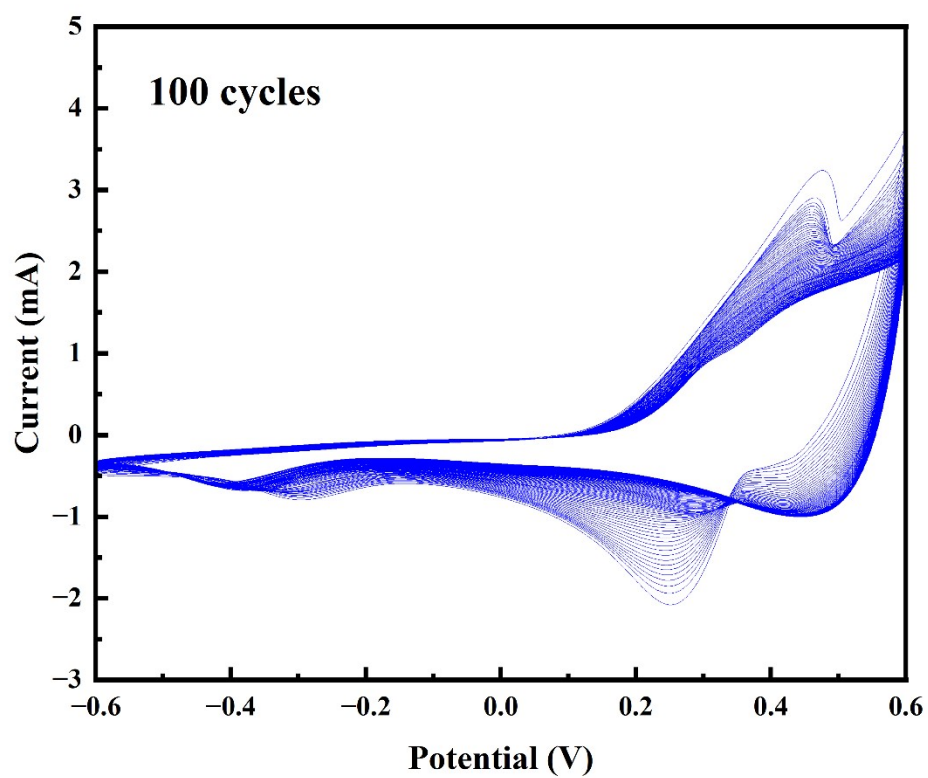

**Fig S8.** 100-cycle CV of Co(OH)<sub>2</sub>@AgNPs.

**Table S2. Theoretical selectivity mechanism based on HSAB and hydration energy [1-6].**

| <b>Ion</b>       | <b>Classification</b> | <b>Theoretical Affinity to Ag</b> | <b>Selectivity Response</b> | <b>Mechanism</b>                                                 |
|------------------|-----------------------|-----------------------------------|-----------------------------|------------------------------------------------------------------|
| Hg <sup>2+</sup> | Soft acid             | High / Spontaneous                | Strong response             | Soft acid–soft base interaction, forming AgHg <sub>3</sub> alloy |
| Pb <sup>2+</sup> | Borderline acid       | Low                               | Weak/very weak response     | Weak orbital overlap, no alloy formation                         |
| Cd <sup>2+</sup> | Borderline acid       | Low                               | Weak/very weak response     | High solvation energy shielding                                  |
| Cu <sup>2+</sup> | Borderline acid       | Negligible                        | Weak/very weak response     | Jahn-Teller distortion-induced bond weakening                    |
| Zn <sup>2+</sup> | Hard acid             | Negligible                        | No response                 | Strong hydration shell screening                                 |
| Ni <sup>2+</sup> | Hard acid             | Negligible                        | No response                 | High crystal field stabilization energy                          |

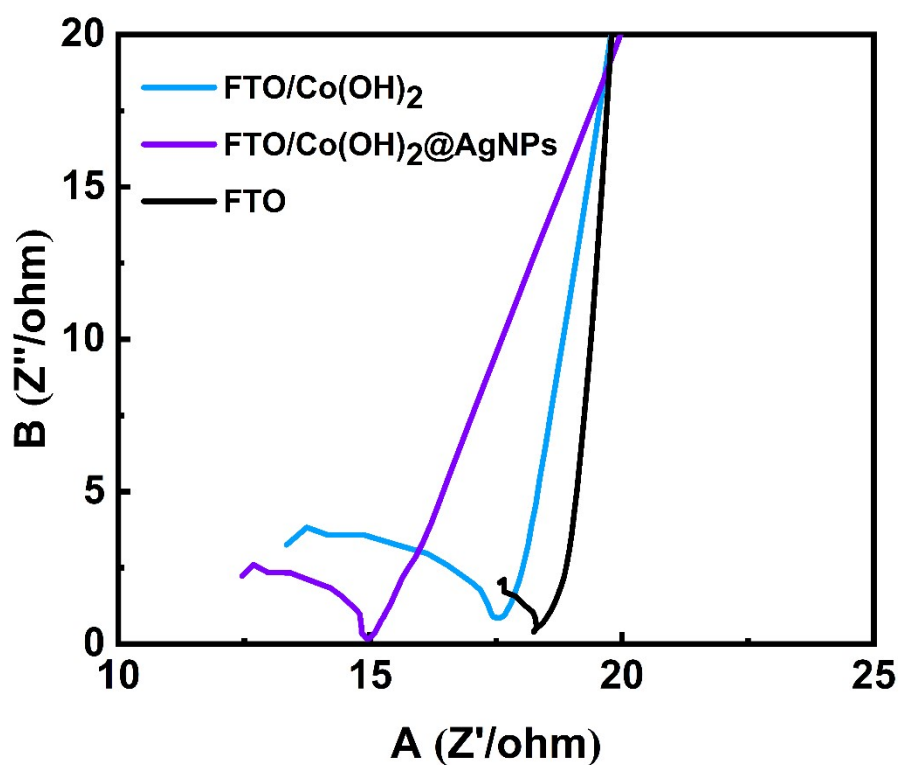

Fig S9. EIS comparison of blank FTO, FTO/Co(OH)<sub>2</sub>, and FTO/Co(OH)<sub>2</sub>@AgNPs.

Table S3. Comparative Electrochemical Performance of FTO, FTO/Co(OH)<sub>2</sub> and FTO/Co(OH)<sub>2</sub>@AgNPs Electrodes

| Parameter                       | FTO          | FTO/Co(OH) <sub>2</sub> | FTO/Co(OH) <sub>2</sub> @AgNPs |
|---------------------------------|--------------|-------------------------|--------------------------------|
| Estimated $R_{ct}$ ( $\Omega$ ) | ~18 $\Omega$ | ~14 $\Omega$            | ~10 $\Omega$                   |
| Charge transfer ability         | Poor         | Moderate                | Excellent                      |
| Electrocatalytic activity       | Low          | Medium                  | High                           |
| Interfacial resistance          | High         | Medium                  | Low                            |
| Modification effect             | —            | Improved                | Significantly improved         |

**Note:** The  $R_{ct}$  values are estimated based on the semicircle diameter read from the Nyquist plot (not precisely measured).

**Table S4. Size-Sieving Effect of Layered Co(OH)<sub>2</sub>  
(Interlayer Spacing = 0.46 nm)[7, 8]**

| <b>Substance</b>                    | <b>Characteristic Size (nm)</b> | <b>Can Enter Interlayer?</b> | <b>Sieving Effect</b> |
|-------------------------------------|---------------------------------|------------------------------|-----------------------|
| <b>Hg<sup>2+</sup></b>              | 0.112 (ionic radius)            | Yes                          | No barrier            |
| <b>Cd<sup>2+</sup></b>              | 0.109 (ionic radius)            | Yes                          | Partial entry         |
| <b>Pb<sup>2+</sup></b>              | 0.133 (ionic radius)            | Yes                          | Partial entry         |
| <b>Parathion</b>                    | >1.2 (molecular size)           | No                           | Complete blocking     |
| <b>AsO<sub>4</sub><sup>3-</sup></b> | 0.46 (hydration radius)         | Critical restriction         | Significant hindrance |
| <b>Protein molecules</b>            | >3.0 (molecular size)           | No                           | Complete blocking     |

**Table S5. The recovery rate of Hg<sup>2+</sup> at different concentrations in river water.**

| Background Value (nM) | Spiked Amount (nM) | Measured Value (nM) | Recovery (%) | RSD (%) | Pretreatment Method        |
|-----------------------|--------------------|---------------------|--------------|---------|----------------------------|
| ND                    | 15                 | 14.7                | 98.0         | 3.2     | 0.45 µm filtration, pH 7.0 |
| —                     | 50                 | 51.1                | 102.2        | 2.5     | —                          |
| —                     | 100                | 98.5                | 98.5         | 1.8     | —                          |

**Notes:**

1. **ND:** Not detected (below LOD = 0.85 nM).
2. **Recovery calculation formula:** Recovery (%) = [(Measured value – Background value)/Spiked amount] × 100%.
3. **RSD:** Relative standard deviation from three parallel experiments (n = 3), reflecting method precision.
4. **Pretreatment:** All water samples were filtered through a 0.45 µm membrane to remove suspended particles, and the pH was adjusted to 7.0 (consistent with the electrolyte) using 0.1 M NaOH/H<sub>2</sub>SO<sub>4</sub>.

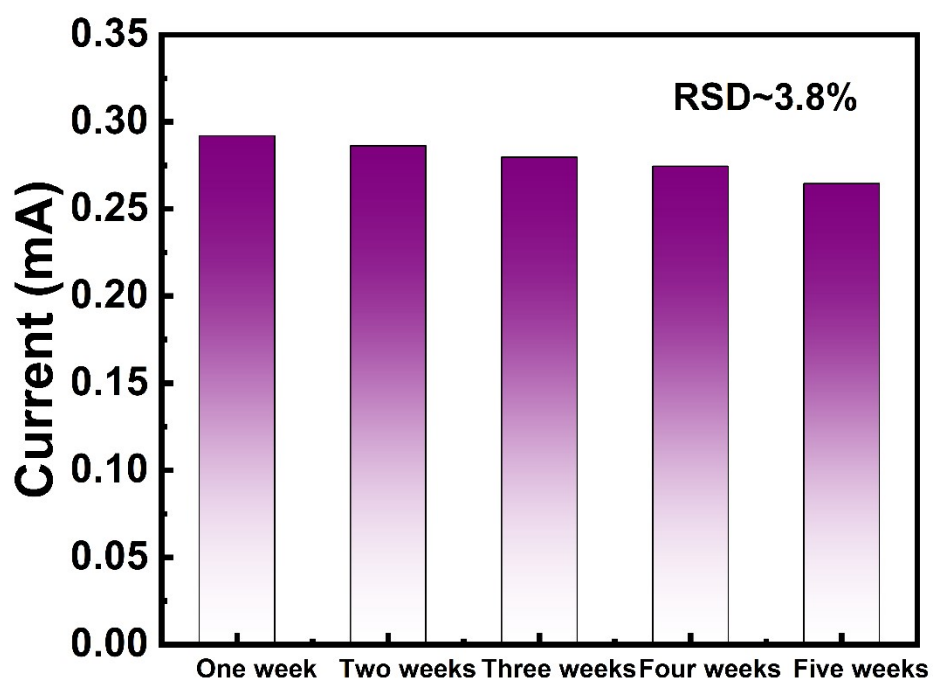

**Fig S10.** Long-term stability of the FTO/Co(OH)<sub>2</sub>@AgNPs sensor stored over 5 weeks. (The concentration of Hg<sup>2+</sup>: 100 nM)

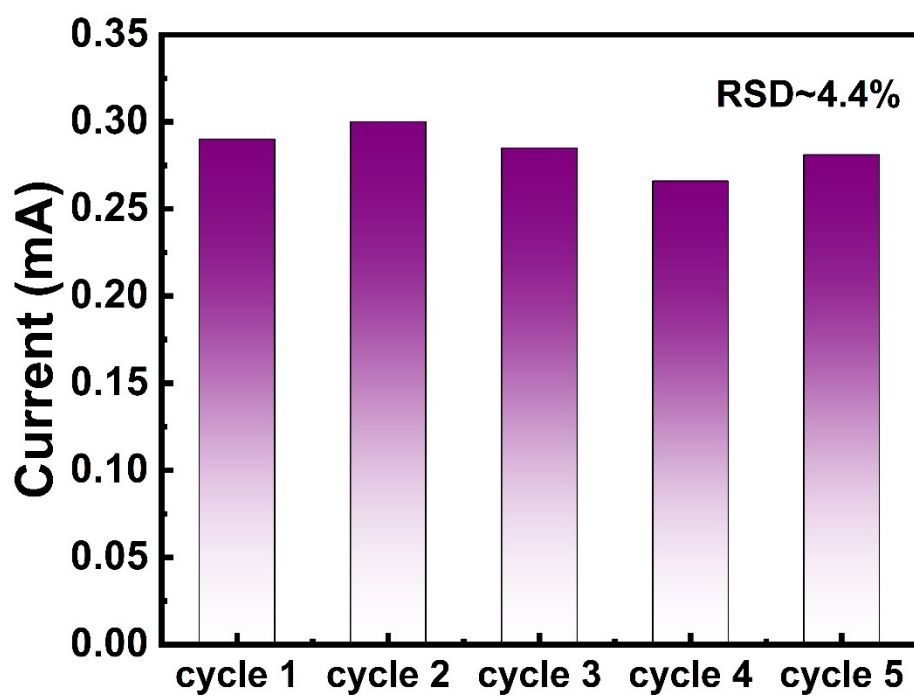

**Fig S11.** Repeatability of the sensor for five successive measurements on a single electrode.  
(The concentration of  $\text{Hg}^{2+}$ : 100 nM)

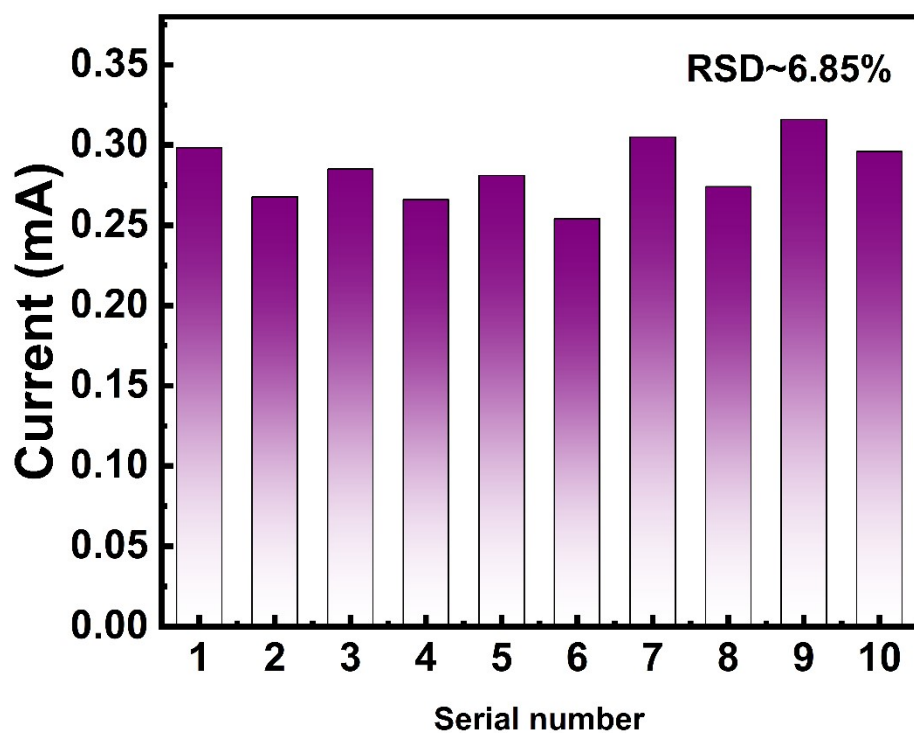

**Fig S12.** Reproducibility of ten independently fabricated electrodes. (The concentration of  $\text{Hg}^{2+}$ : 100 nM)

## References

- [1] W. Sachtler, "Chemisorption complexes on alloy surfaces," *Catalysis Reviews—Science and Engineering*, vol. 14, no. 1, pp. 193-210, 1976.
- [2] J. A. Steckel, "Density functional theory study of mercury adsorption on metal surfaces," *Physical Review B—Condensed Matter and Materials Physics*, vol. 77, no. 11, p. 115412, 2008.
- [3] M. Akbari, "Adsorption of MCl<sub>2</sub> (M= Hg, Cd, and Pb) on CuS (001) surface. Density functional theory study," *Environment Protection Engineering*, vol. 51, no. 2, 2025.
- [4] G. A. Bodkhe, B. Hedau, M. S. More, M. Kim, and M. D. Shirsat, "Electrochemical Sensing of Hg<sup>2+</sup> Ions Using an SWNTs/Ag@ ZnBDC Composite with Ultra-Low Detection Limit," *Chemosensors*, vol. 13, no. 7, p. 259, 2025.
- [5] H. Chen, X. Yang, Y. Li, and J. Chen, "A Density Functional Theory Study on the Effects of Silver Doping on the Properties and Flotation Behavior of Jamesonite," *Molecules*, vol. 30, no. 7, p. 1424, 2025.
- [6] Y. Yang *et al.*, "A highly selective and sensitive nano-silver sol sensor for Hg<sup>2+</sup> and Fe<sup>3+</sup>: green preparation and mechanism," *Polymers*, vol. 14, no. 18, p. 3745, 2022.
- [7] Y. Marcus, "Ionic radii in aqueous solutions," *Chemical Reviews*, vol. 88, no. 8, pp. 1475-1498, 1988.
- [8] X. Wu *et al.*, "Electrodeposition-potential tuning rejuvenates the concurrent preparation from  $\alpha$ -Co (OH) <sub>2</sub> with larger interlayer-spacings to  $\beta$ -Co (OH) <sub>2</sub>," *Batteries & Supercaps*, p. e202400699, 2025.
